# Supplementary material for: Computational–experimental assessment of transition-metal doping of Co 3 O 4 for acidic oxygen evolution reaction with balanced activity and stability
Source: Royal Society of Chemistry journal article supplement (doi:10.1039/d5ta08166a), 2025-12-01
Supplement: d5ta08166a1.pdf [file d5ta08166a1.pdf]

# Computational-experimental assessment of transition-metal doping of Co<sub>3</sub>O<sub>4</sub> for acidic oxygen evolution reaction with balanced activity and stability

Sivasankara Rao Ede <sup>a,b</sup>, Hanna M. Paige <sup>a</sup>, Jett Wu <sup>a</sup>, Chandra M. Adhikari <sup>a</sup>, Amar S. Kumbhar <sup>c</sup>, Shubo Han <sup>a</sup>, and Zhiping Luo <sup>a,\*</sup>

<sup>a</sup> Department of Chemistry, Physics, and Materials Science, Fayetteville State University, Fayetteville, North Carolina 28301, USA. E-mail: [zluo@uncfsu.edu](mailto:zluo@uncfsu.edu)

<sup>b</sup> Department of Chemistry, Koneru Lakshmaiah Education Foundation, Green Fields, Vaddeswaram, Andhra Pradesh 522302, India

<sup>c</sup> Chapel Hill Analytical and Nanofabrication Laboratory, University of North Carolina, Chapel Hill, North Carolina 27599, United States

**Table S1** Parameters of doping elements.

| Element                       | Sc       | Ti       | V        | Cr       | Mn       | Fe       | Co                        | Ni       | Cu         | Zn         |
|-------------------------------|----------|----------|----------|----------|----------|----------|---------------------------|----------|------------|------------|
| Electronegativity             | 1.36     | 1.54     | 1.63     | 1.66     | 1.55     | 1.83     | 1.88                      | 1.91     | 1.9        | 1.65       |
| Ionic size (Å)                | 0.745    | 0.605    | 0.64     | 0.615    | 0.58     | 0.55     | 0.545 oct.<br>0.61 tetra. | 0.56     | 0.73       | 0.74       |
| $U - J$ (eV)                  | 3.5      | 4.0      | 4.0      | 3.0      | 3.0      | 3.1      | 2.5                       | 4.2      | 5.0        | 0.0        |
| Starting magnetic moment (μB) | 1.0 oct. | 1.5 oct. | 2.5 oct. | 3.0 oct. | 4.0 oct. | 5.0 oct. | 1.0 oct.<br>3.0 tetra.    | 1.0 oct. | 1.0 tetra. | 0.0 tetra. |

**Table S2** Lobster input file “lobsterin”.

basisSet pbeVaspFit2015

# generate many Co–O / metal–metal / O–O pairs automatically up to 3.0 Å  
cohGenerator from 0.1 to 3.0

# write COHP curves and the integrated list

coh

# (optional) energy window, adjust to your system if needed

COHPstartEnergy -100.0

COHPendEnergy 20

# density of states (optional)

dos

**Table S3** Calculated formation energy and dissolution potential.

| Dopant        | Formation energy, $E_f$ (eV) | Standard dissolution potential of bulk metal, $U_{diss}^0$ (V) | Dissolution potential, $U_{diss}$ (V vs. SHE) |
|---------------|------------------------------|----------------------------------------------------------------|-----------------------------------------------|
| Sc            | -6.514                       | -2.08                                                          | 0.09                                          |
| Ti            | -6.853                       | -1.63                                                          | 0.08                                          |
| V             | -4.212                       | -1.18                                                          | -0.34                                         |
| Cr            | -4.090                       | -0.91                                                          | 0.45                                          |
| Mn            | -1.977                       | -1.19                                                          | -0.70                                         |
| Fe            | -1.156                       | -0.45                                                          | -0.06                                         |
| Co (pristine) | 0                            | -0.28                                                          | -0.28                                         |
| Ni            | -0.282                       | -0.26                                                          | -0.12                                         |
| Cu            | 0.460                        | 0.34                                                           | 0.11                                          |
| Zn            | 0.601                        | -0.76                                                          | -1.06                                         |

**Table S4** ZPE and  $T\Delta S$  values.

| Phase                | ZPE (eV) | $T\Delta S$ (eV) |
|----------------------|----------|------------------|
| *                    | 0        | 0                |
| *O                   | 0.05     | 0                |
| *OH                  | 0.37     | 0                |
| *OOH                 | 0.48     | 0                |
| H <sub>2</sub> O (l) | 0.57     | 0.67             |
| H <sub>2</sub> (g)   | 0.27     | 0.41             |

**Table S5** Calculated binding energies of the \*O, \*OH, and \*OOH intermediates in doped Co<sub>3</sub>O<sub>4</sub>.

| Dopant        | $\Delta G_{*OH}$ (eV) | $\Delta G_{*O}$ (eV) | $\Delta G_{*OOH}$ (eV) | $\Delta G_{*O} - \Delta G_{*OH}$ (eV) | $-\eta$ (V) |
|---------------|-----------------------|----------------------|------------------------|---------------------------------------|-------------|
| Sc            | 1.19                  | 2.98                 | 4.45                   | 1.79                                  | -0.56       |
| Ti            | 1.96                  | 3.72                 | 4.89                   | 1.76                                  | -0.53       |
| V             | 0.15                  | 1.66                 | 3.39                   | 1.51                                  | -0.5        |
| Cr            | 1.25                  | 2.77                 | 4.36                   | 1.52                                  | -0.36       |
| Mn            | 0.69                  | 1.74                 | 3.63                   | 1.05                                  | -0.66       |
| Fe            | 1.14                  | 2.41                 | 3.91                   | 1.27                                  | -0.27       |
| Co (pristine) | 0.51                  | 2.3                  | 3.49                   | 1.79                                  | -0.49       |
| Ni            | 1.39                  | 2.95                 | 4.68                   | 1.56                                  | -0.33       |
| Cu            | 1.28                  | 2.72                 | 4.57                   | 1.44                                  | -0.62       |
| Zn            | 0.81                  | 3.06                 | 4.05                   | 2.25                                  | -1.02       |

**Table S6** Oxygen 2p-band center, metal M (dopant and Co) 3d-band center, Co-only 3d-band center, and associated covalency.

| Dopant        | O 2p-band center, $\varepsilon_{O-p}$ (eV) | M (dopant and Co) 3d-band center, $\varepsilon_{M-d}$ (eV) | Co 3d-band center, $\varepsilon_{Co-d}$ (eV) | Covalency, $\varepsilon_{M-d} - \varepsilon_{O-p}$ (eV) | Covalency, $\varepsilon_{Co-d} - \varepsilon_{O-p}$ (eV) | $-\eta$ (V) |
|---------------|--------------------------------------------|------------------------------------------------------------|----------------------------------------------|---------------------------------------------------------|----------------------------------------------------------|-------------|
| Sc            | -5.010                                     | -2.300                                                     | -2.280                                       | 2.710                                                   | 2.730                                                    | -0.56       |
| Ti            | -5.136                                     | -2.253                                                     | -2.282                                       | 2.882                                                   | 2.854                                                    | -0.53       |
| V             | -5.283                                     | -2.355                                                     | -2.328                                       | 2.928                                                   | 2.956                                                    | -0.5        |
| Cr            | -5.191                                     | -2.312                                                     | -2.308                                       | 2.879                                                   | 2.883                                                    | -0.36       |
| Mn            | -4.940                                     | -2.091                                                     | -2.047                                       | 2.849                                                   | 2.894                                                    | -0.66       |
| Fe            | -5.155                                     | -2.389                                                     | -2.295                                       | 2.766                                                   | 2.859                                                    | -0.27       |
| Co (pristine) | -4.768                                     | -1.984                                                     | -1.984                                       | 2.784                                                   | 2.784                                                    | -0.49       |
| Ni            | -4.970                                     | -2.135                                                     | -2.162                                       | 2.836                                                   | 2.809                                                    | -0.33       |
| Cu            | -4.904                                     | -1.950                                                     | -1.973                                       | 2.954                                                   | 2.931                                                    | -0.62       |
| Zn            | -5.046                                     | -2.514                                                     | -2.301                                       | 2.532                                                   | 2.745                                                    | -1.02       |

**Table S7** Calculated averaged ICOHP values of O–H bond from the intermediates (\*OH and \*OOH), Co–O bond from the intermediates (\*O, \*OH, and \*OOH) attached on active Co site, and M–O bonds (M is Co for the pristine sample) of doping element M with its all O neighbors.

| Element M | ICOHP <sub>O-H</sub> | ICOHP <sub>Co-O</sub> | ICOHP <sub>M-O</sub> |
|-----------|----------------------|-----------------------|----------------------|
| Sc        | -3.793               | -1.922                | -1.482               |
| Ti        | -3.686               | -2.032                | -2.007               |
| V         | -3.807               | -2.049                | -2.102               |
| Cr        | -3.761               | -2.034                | -1.645               |
| Mn        | -3.665               | -2.038                | -1.383               |
| Fe        | -3.699               | -2.041                | -1.258               |
| Co        | -3.796               | -1.976                | -1.163               |
| Ni        | -3.759               | -1.964                | -1.002               |
| Cu        | -3.647               | -1.985                | -0.802               |
| Zn        | -3.884               | -1.913                | -0.688               |

**Table S8** Calculated averaged bond length of O–H bond from the intermediates (\*OH and \*OOH), Co–O bond from the intermediates (\*O, \*OH, and \*OOH) attached on the active Co site, and M–O bonds (M is Co for the pristine sample) of the doping element M with all its O neighbors.

| Element M | O–H bond (Å) | Co–O bond (Å) | M–O bond (Å) |
|-----------|--------------|---------------|--------------|
| Sc        | 1.001        | 1.764         | 2.093        |
| Ti        | 1.010        | 1.737         | 1.940        |
| V         | 1.000        | 1.730         | 1.851        |
| Cr        | 1.008        | 1.735         | 1.902        |
| Mn        | 1.012        | 1.736         | 1.902        |
| Fe        | 1.010        | 1.735         | 1.897        |
| Co        | 1.002        | 1.752         | 1.915        |
| Ni        | 1.003        | 1.753         | 1.912        |
| Cu        | 1.013        | 1.753         | 2.004        |
| Zn        | 0.990        | 1.766         | 2.006        |

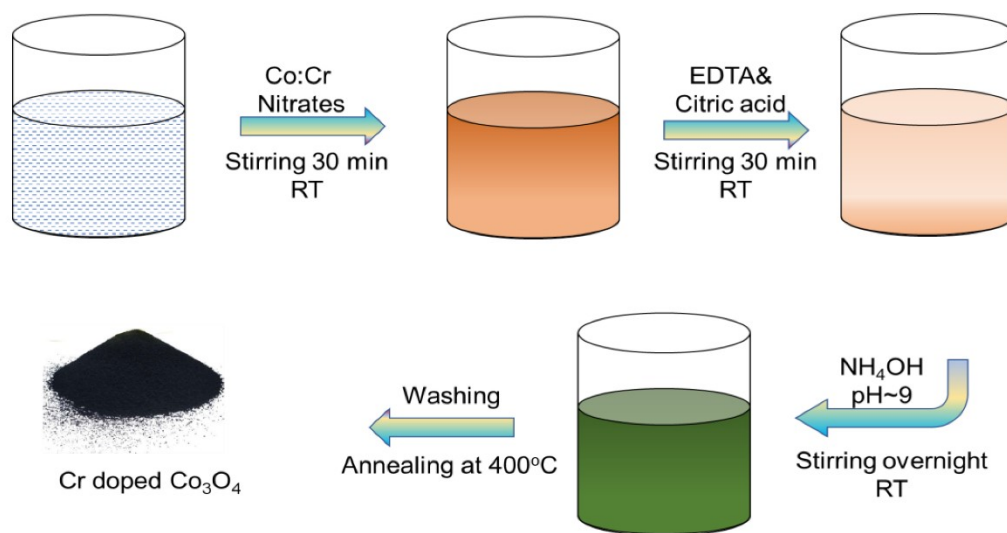

**Figure S1** Schematic of the sample synthesis procedures.

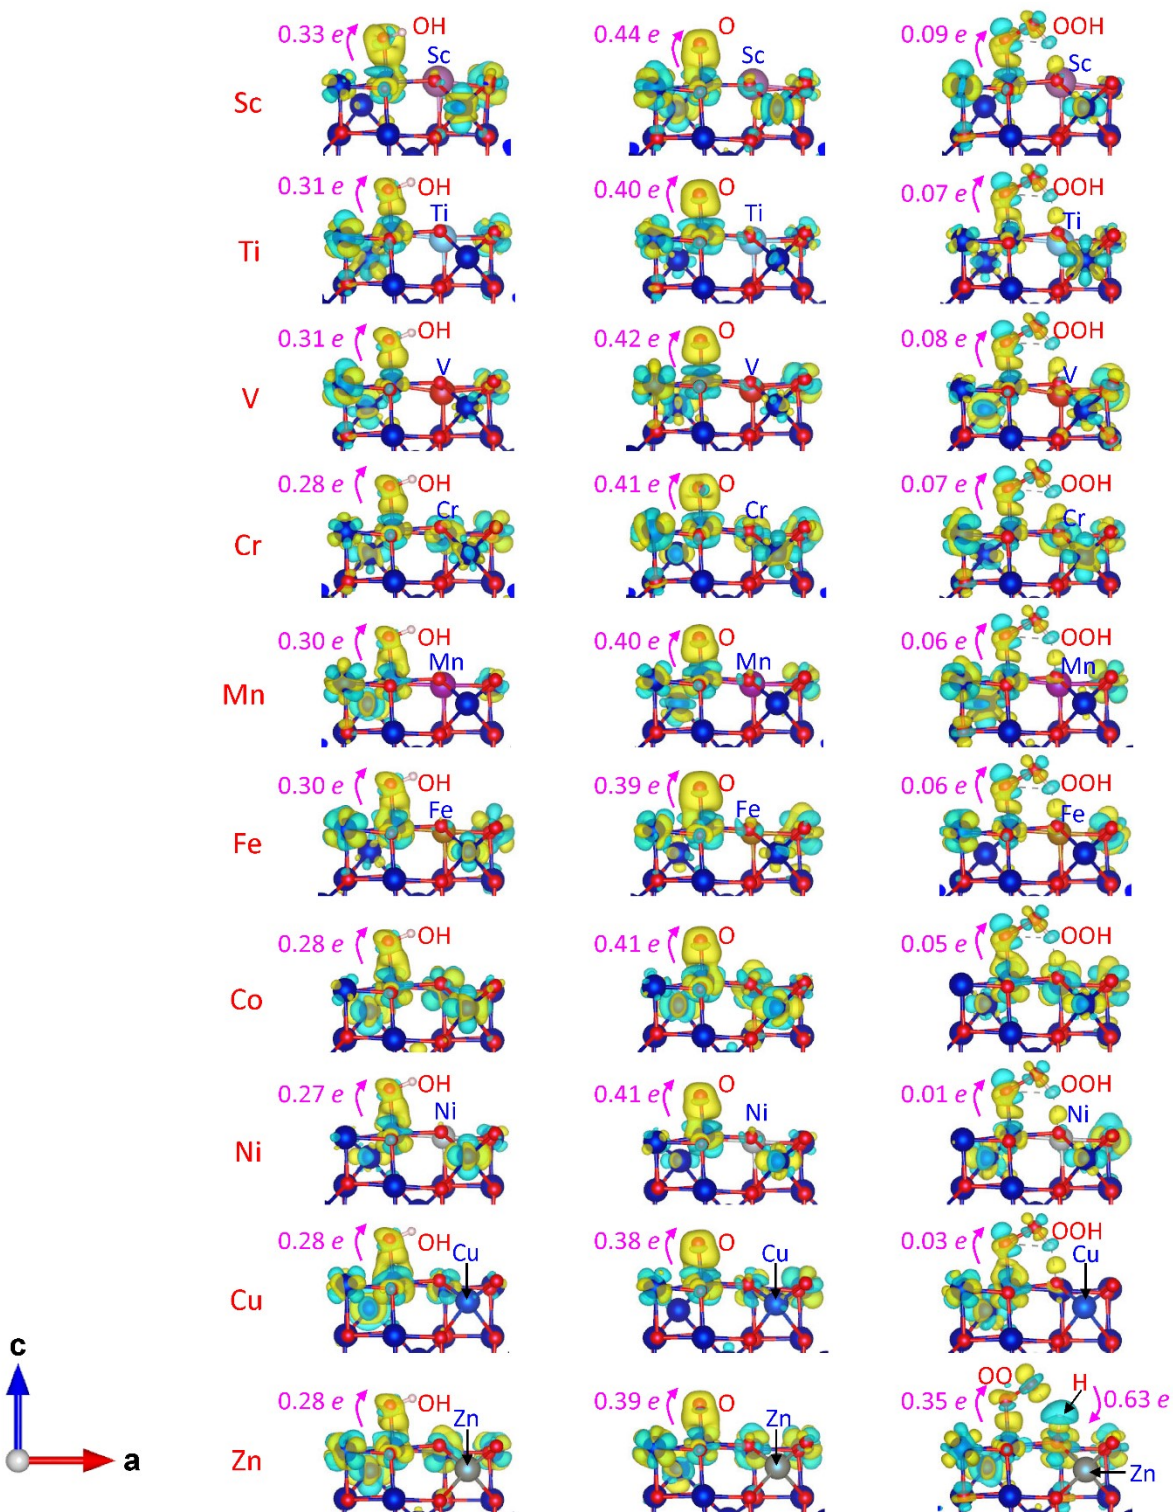

**Figure S2** Calculated charge difference of slabs when attached with \*OH (left), \*O (middle), and \*OOH (right) intermediates. The Bader charge transfers are indicated.

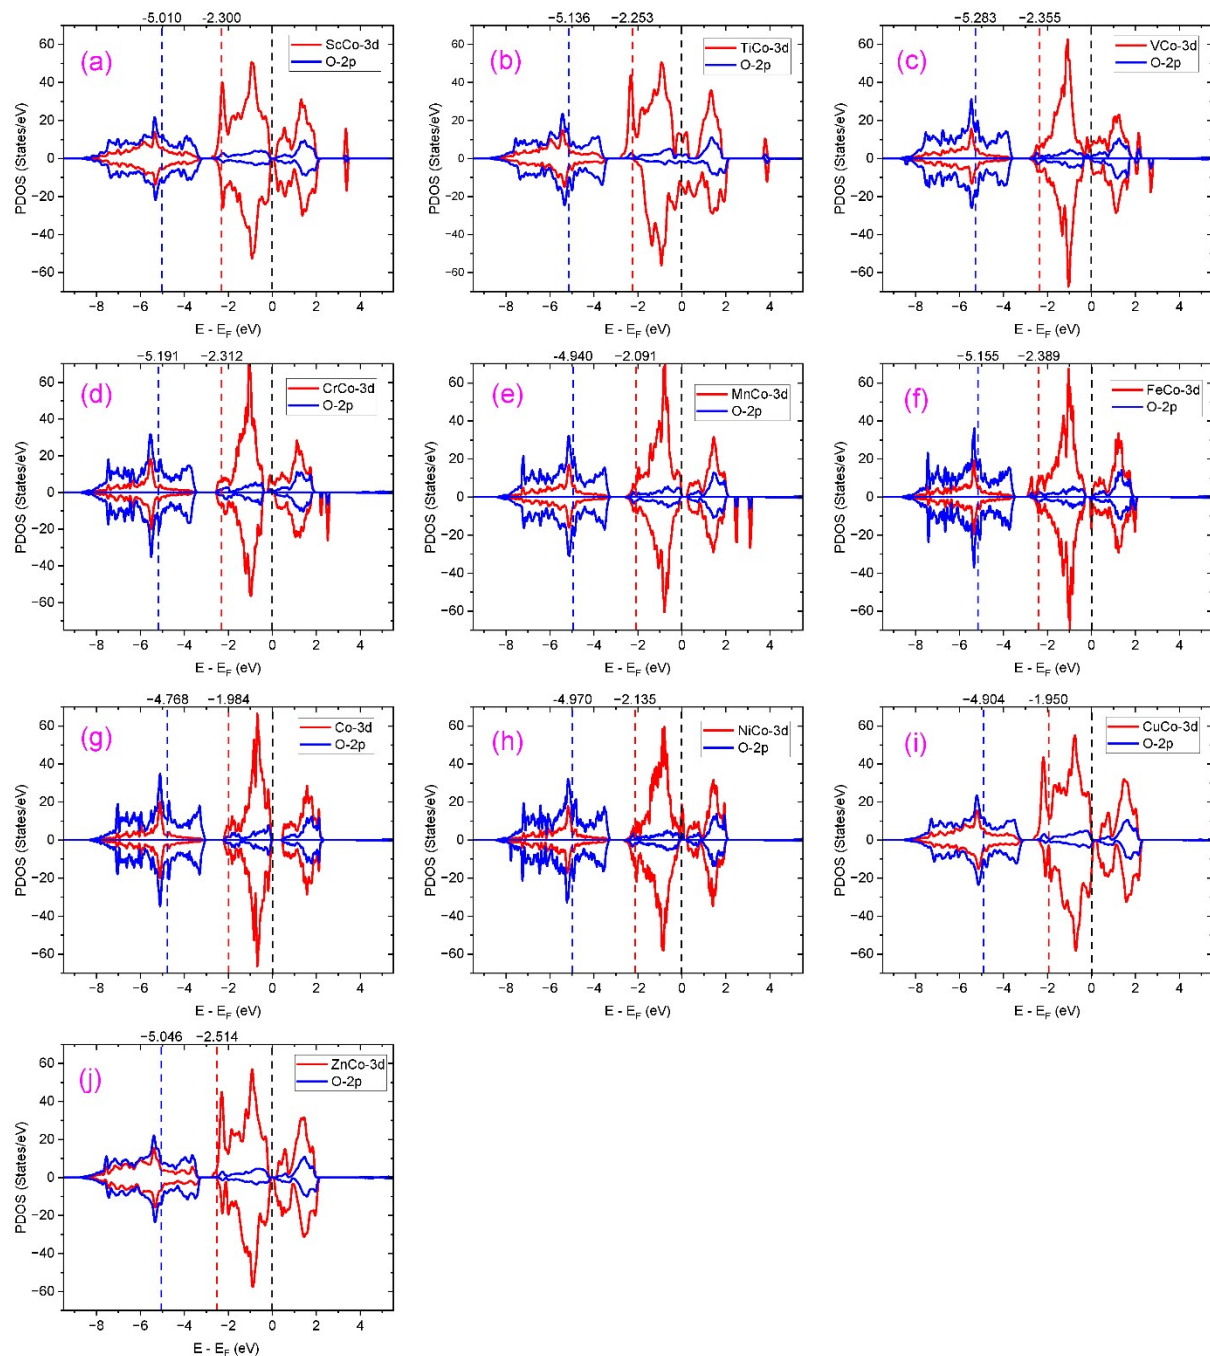

**Figure S3** Calculated partial density of states of metal M (both dopant and Co) 3d and oxygen 2p in  $\text{Co}_3\text{O}_4$  doped with Sc (a), Ti (b), V (c), Cr (d), Mn (e), Fe (f), Co (undoped) (g), Ni (h), Cu (i), and Zn (j). The 3d-band centers of transition metals and the oxygen 2p band centers are marked.



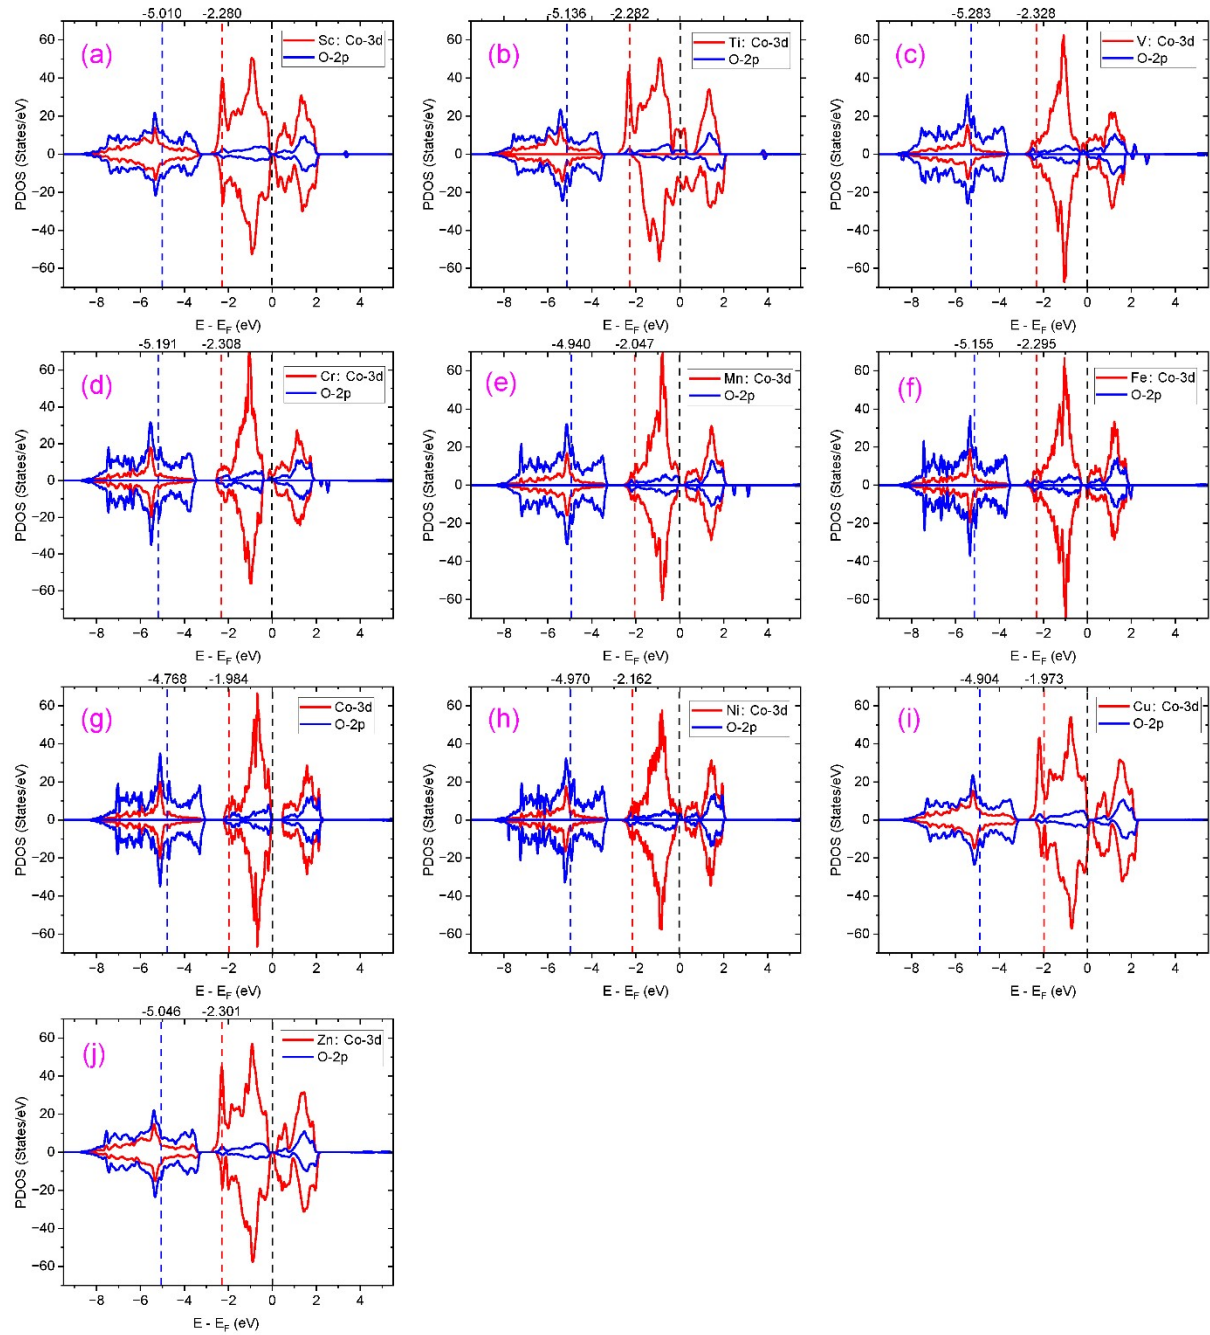

**Figure S4** Calculated partial density of states of Co 3d (without dopant M contribution) and oxygen 2p in  $\text{Co}_3\text{O}_4$  doped with Sc (a), Ti (b), V (c), Cr (d), Mn (e), Fe (f), Co (undoped) (g), Ni (h), Cu (i), and Zn (j). The 3d-band centers of Co and the oxygen 2p band centers are marked.

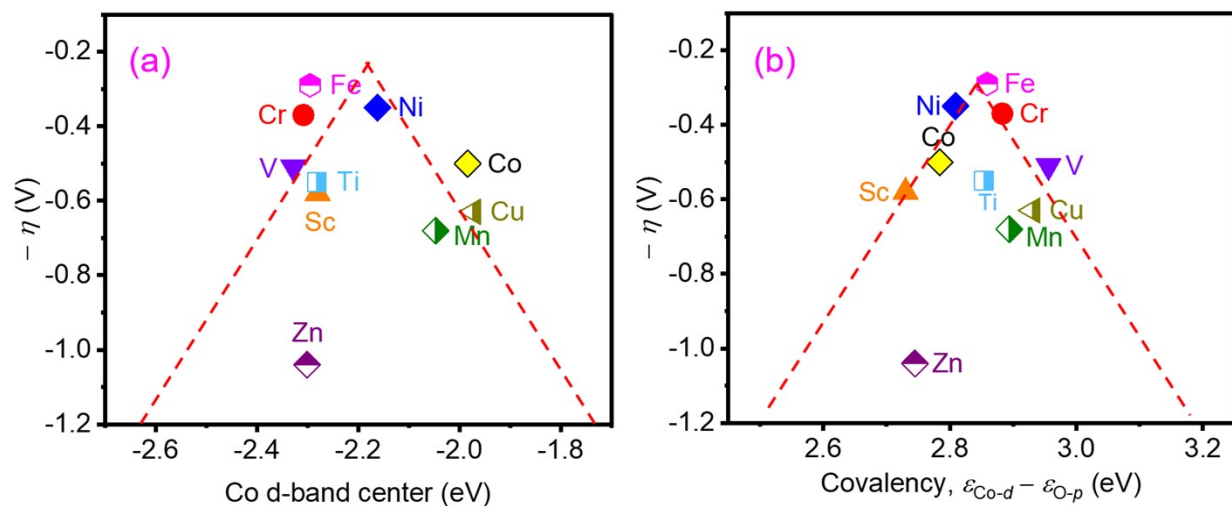

**Figure S5** Calculated negative overpotential as a function of Co d-band center (a), covalency between Co and oxygen (b). Dotted lines guide the eye.



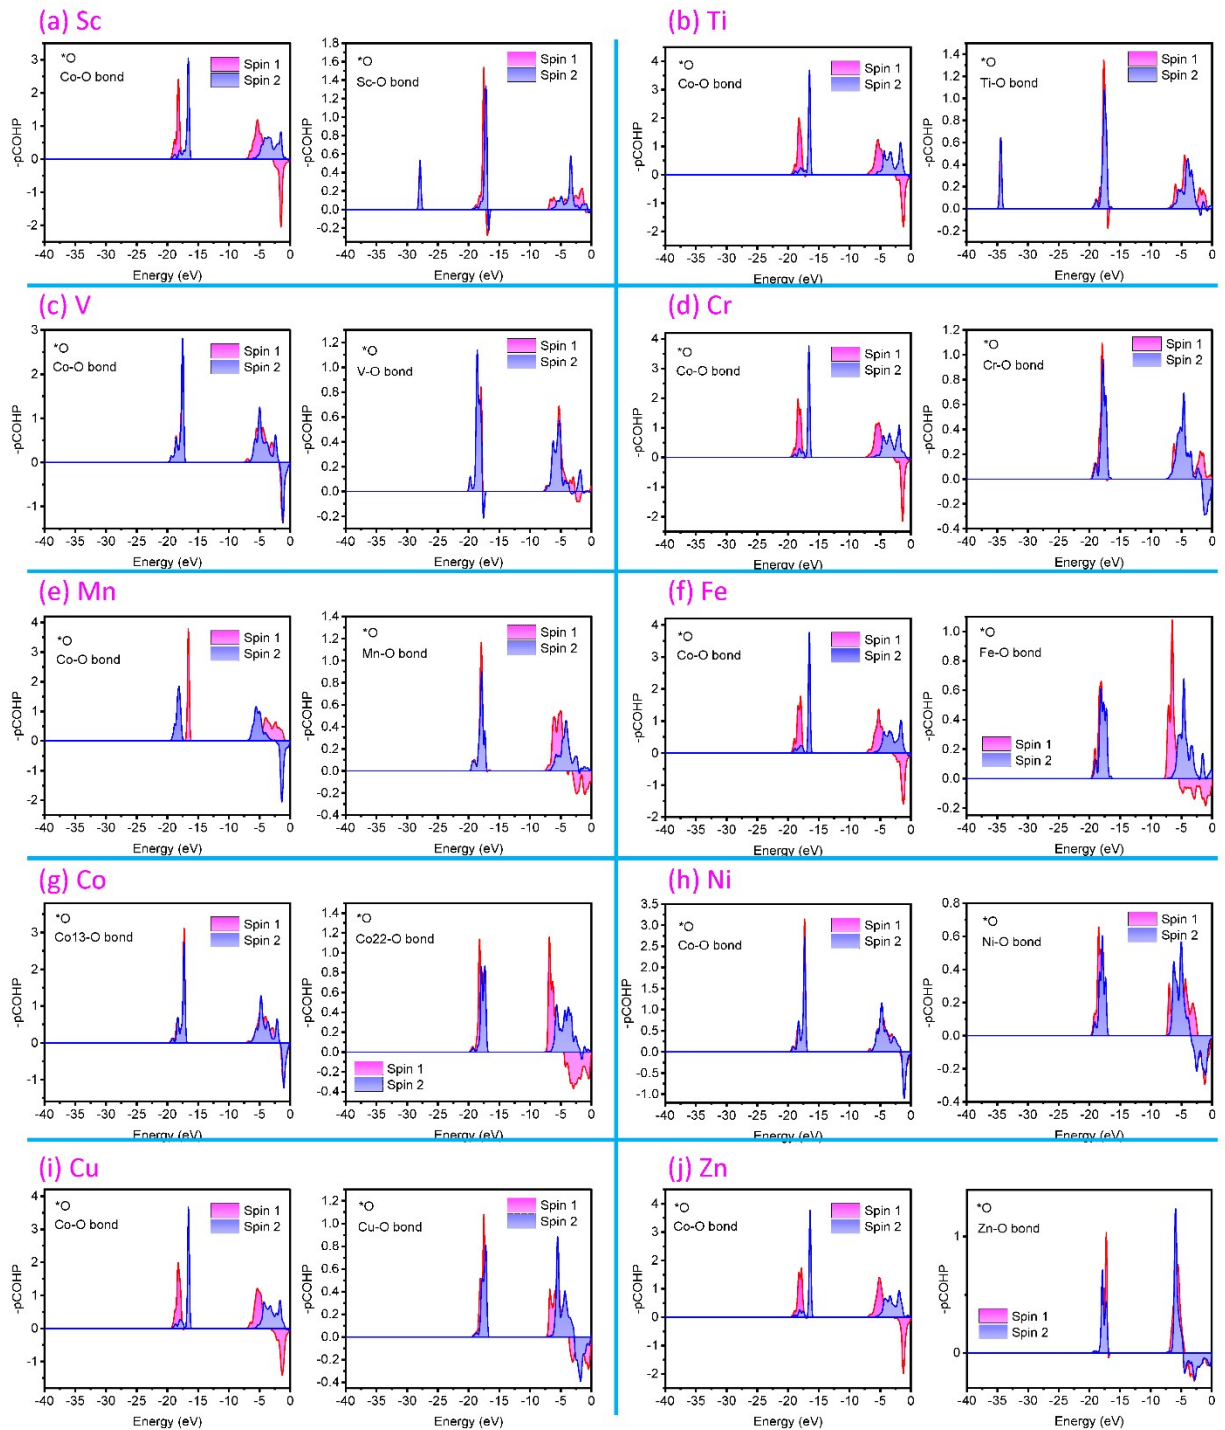

**Figure S6** Calculated pCOHP of M-doped slabs with  $^*O$  intermediate, where Co–O bond is on the active Co site, and M–O bond is the dopant M (or equivalent Co for pristine sample) with one of its neighboring O atoms.

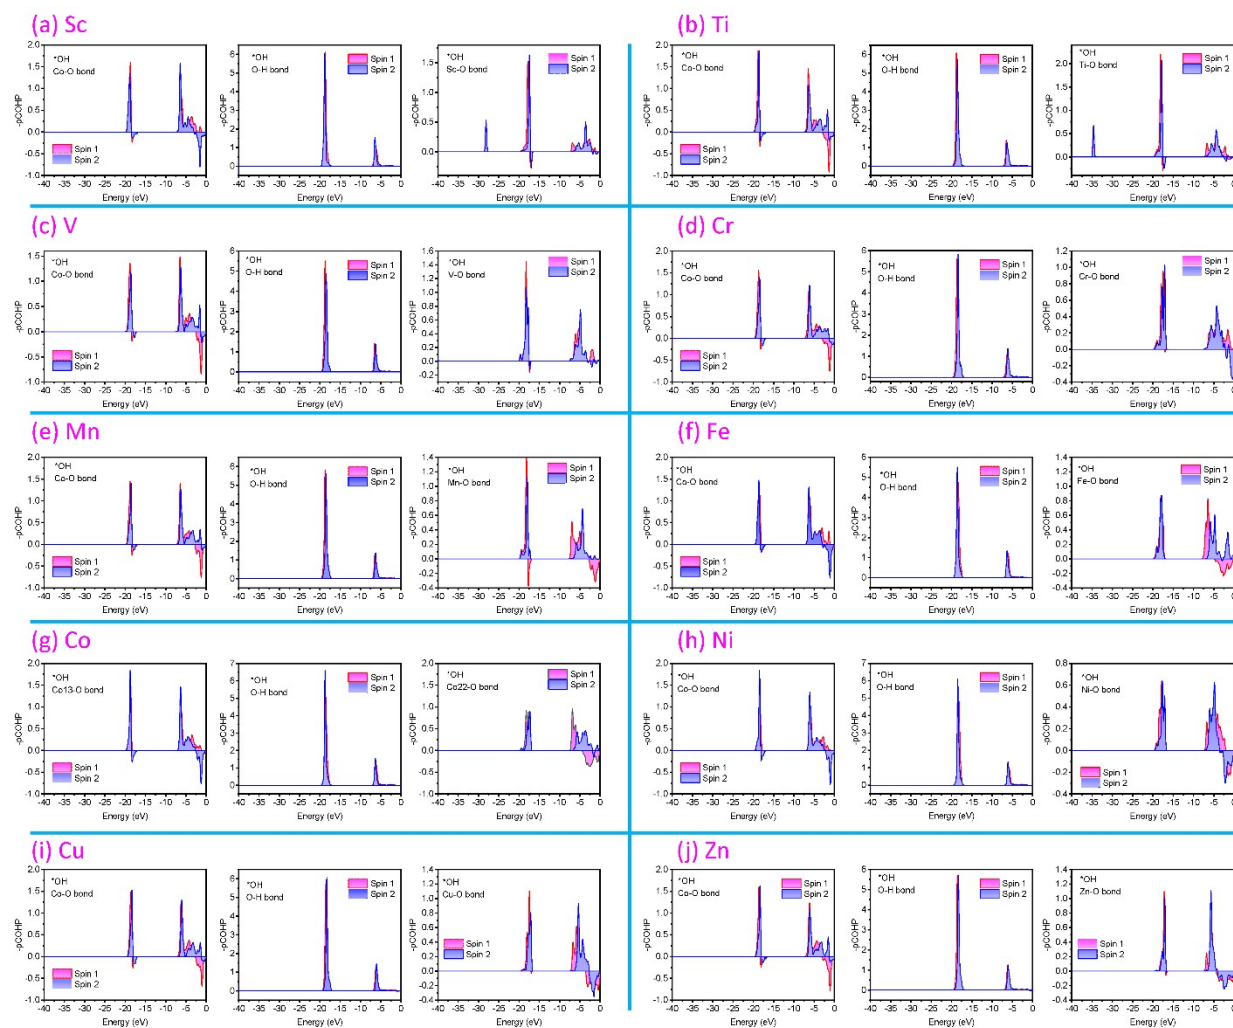

**Figure S7** Calculated pCOHP of M-doped slab with \*OH intermediate. In each figure (a–j), the pCOHP of the Co–O bond on the active Co site is shown on the left, the O–H bond in the middle, and the M–O bond (or equivalent Co–O for the pristine sample) with one of its neighboring O atoms on the right.

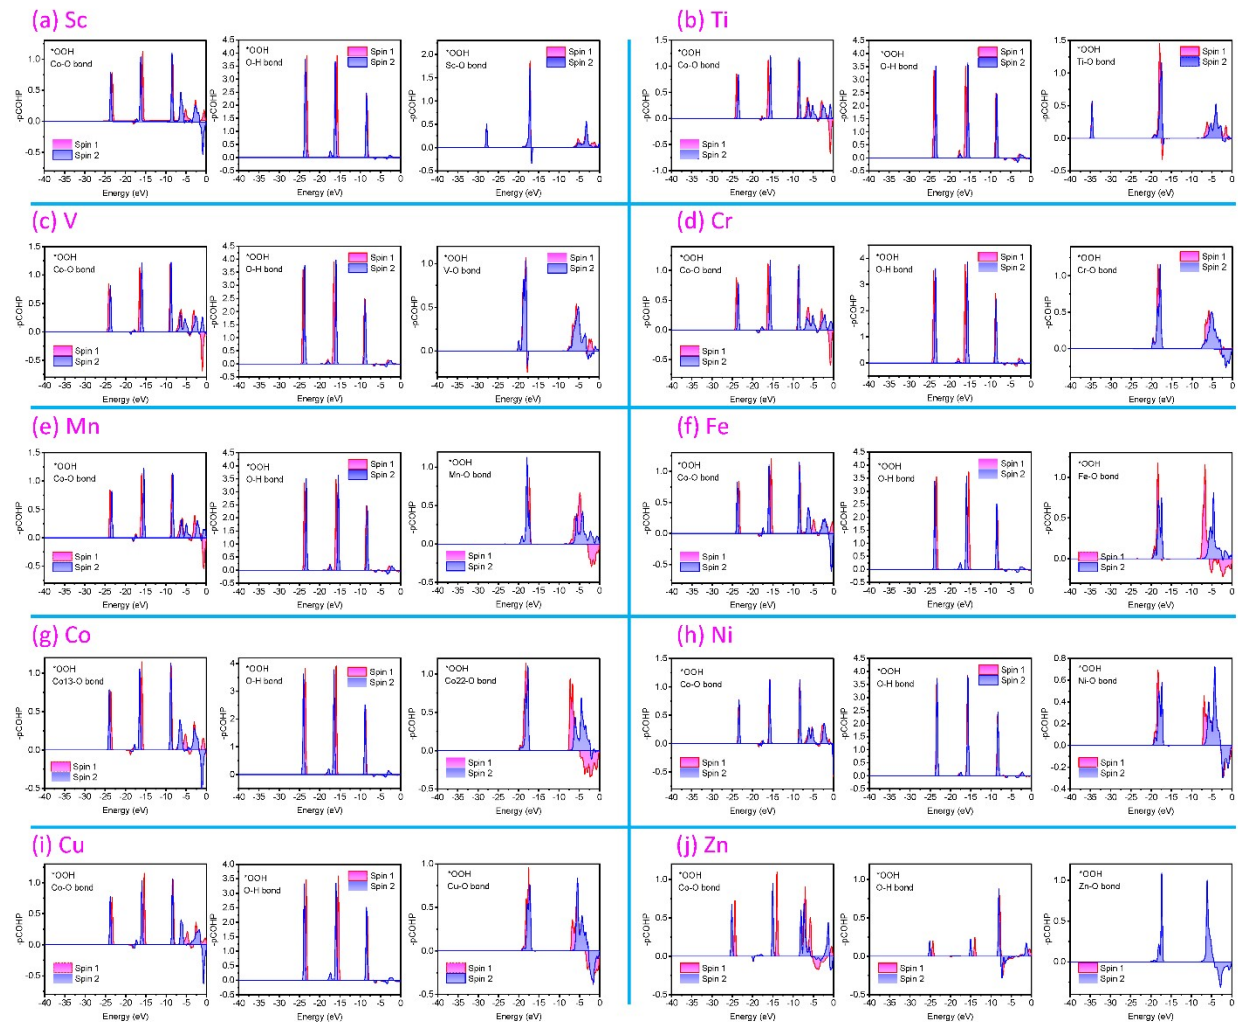

**Figure S8** Calculated pCOHP of M-doped slab with \*OOH intermediate. In each figure (a–j), the pCOHP of the Co–O bond on the active Co site is shown on the left, the O–H bond in the middle, and the M–O bond (or equivalent Co–O for the pristine sample) with one of its neighboring O atoms on the right.

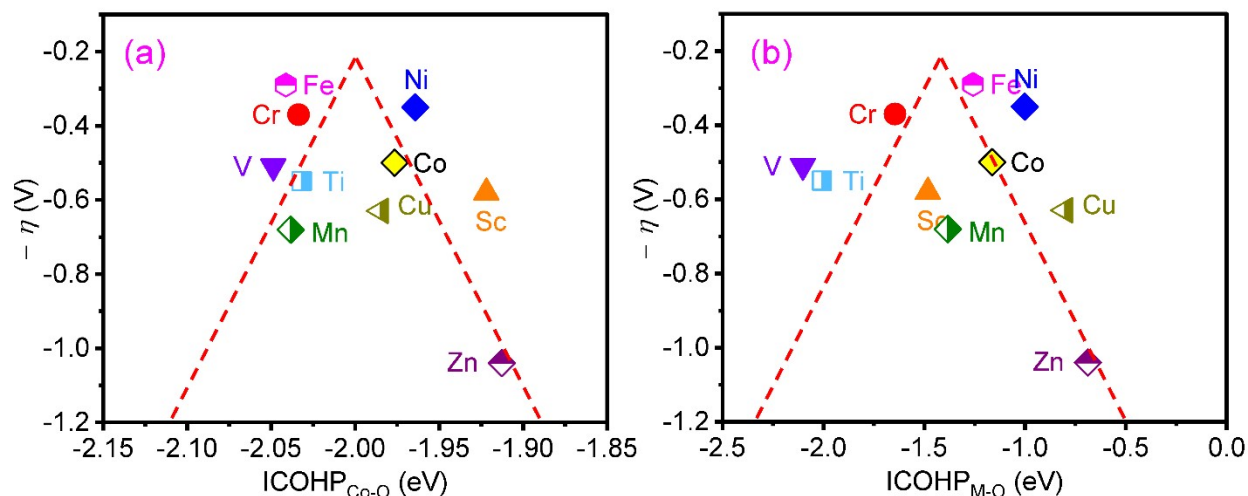

**Figure S9** Calculated negative overpotential as a function of  $\text{ICOHP}_{\text{Co-O}}$  (a) and  $\text{ICOHP}_{\text{M-O}}$  (b). Dotted lines guide the eye.

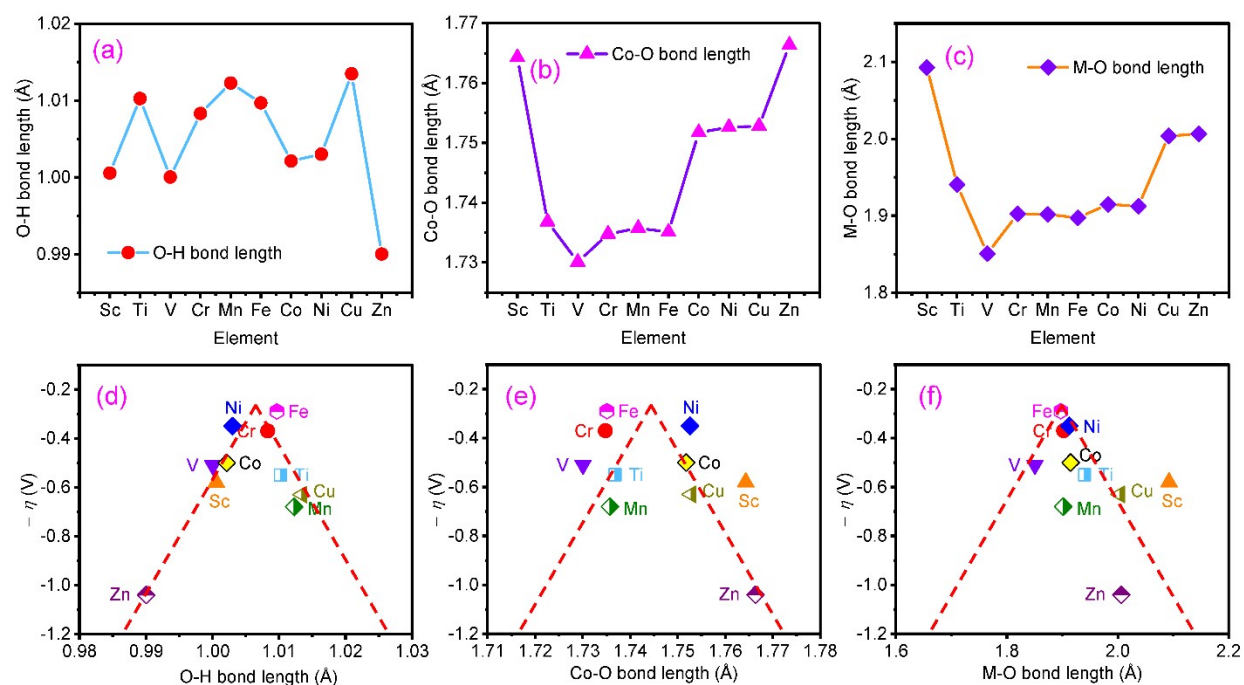

**Figure S10** Calculated O–H bond length averaged from \*OH and \*OOH (a), Co–O bond length averaged from \*O, \*OH, and \*OOH (b), and M–O bond length (M is Co for the pristine sample) averaged from all O neighbors from \*O, \*OH, and \*OOH intermediates. Negative overpotential as a function of their bond length is shown on the bottom row (d–f). Dotted lines guide the eye.

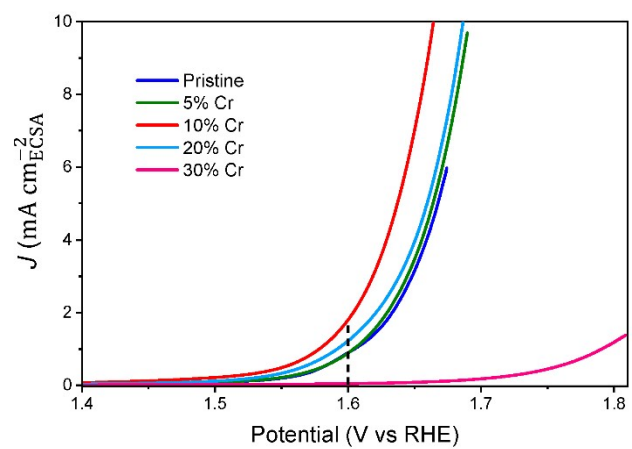

**Figure S11** ECSA normalized LSV curves of pristine and Cr-doped  $\text{Co}_3\text{O}_4$ .
